# Supplementary material for: Graft-derived VWF drives platelet activation and thrombocytopenia during porcine liver xenotransplantation to brain-dead human recipients
Source: JCI journal article supplement (doi:10.1172/jci200800), 2026-03-10
Supplement: sd1 [file 1]

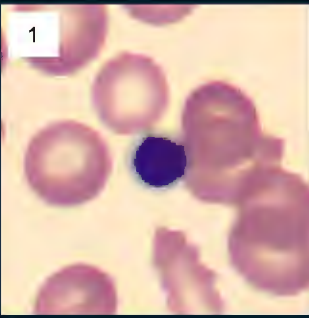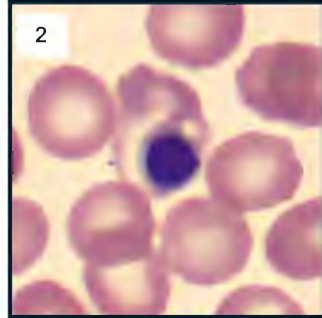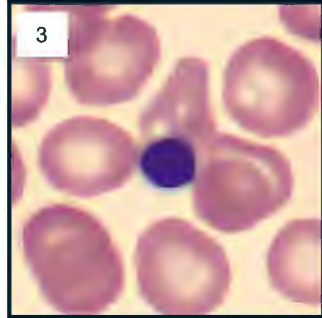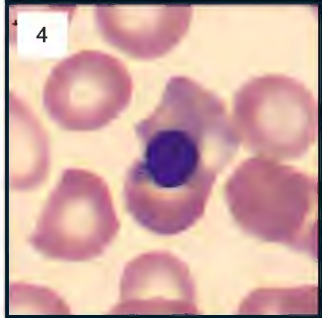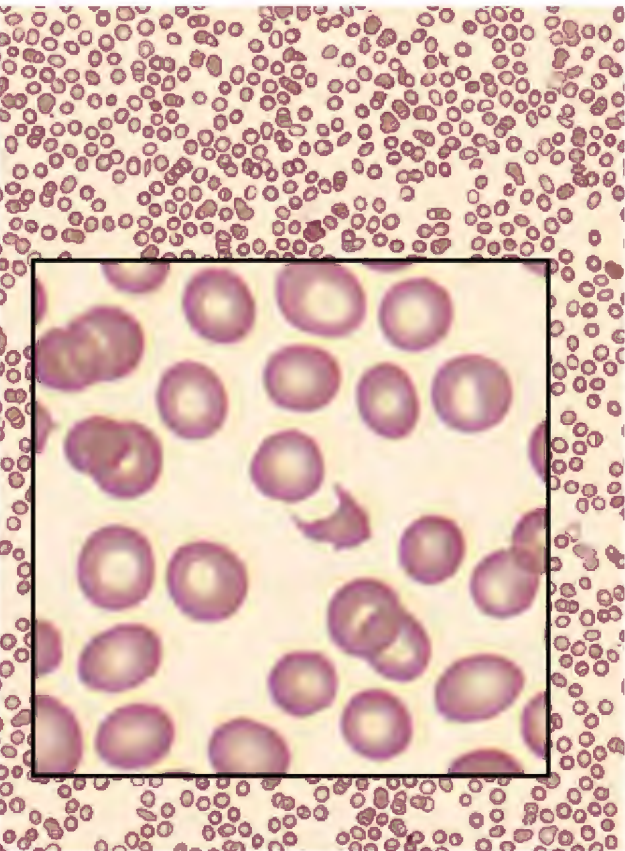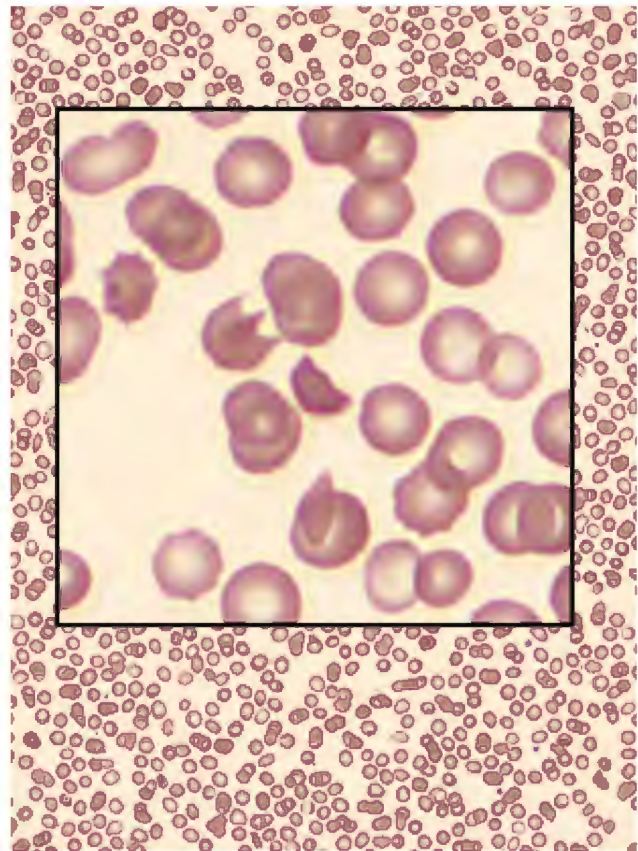

Supplemental Figure 1: Disseminated Intravascular Coagulation in Decedent 4 prior to exposure to the porcine liver. Shown are Cellavision Digital Capture images from a peripheral blood smear of decedent prior to connection to extracorporeal liver cross-circulation with the porcine liver. Schistocytes and nucleated red blood cells were easily seen. The D-Dimer level was 27.72 ug/ml.
